# Supplementary material for: Antigenic Variation of East/Central/South African and Asian Chikungunya Virus Genotypes in Neutralization by Immune Sera
Source: PubMed Central journal article supplement (PMC5003353; doi:10.1371/journal.pntd.0004960), 2016-08-29

**Pooled  
ECSA sera**

**MY/08/065 (ECSA)**

**MY/06/37348 (Asian)**

**1:100  
dilution**

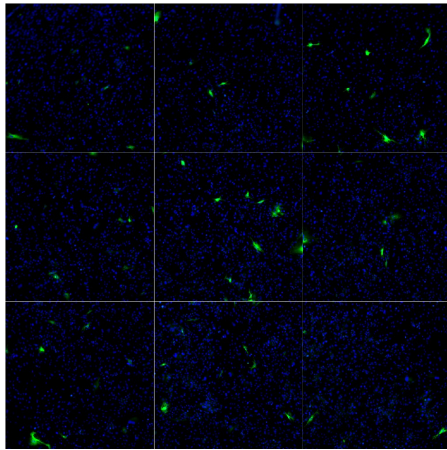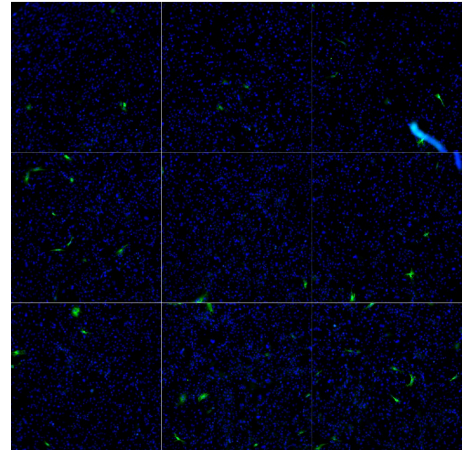

**1:400  
dilution**

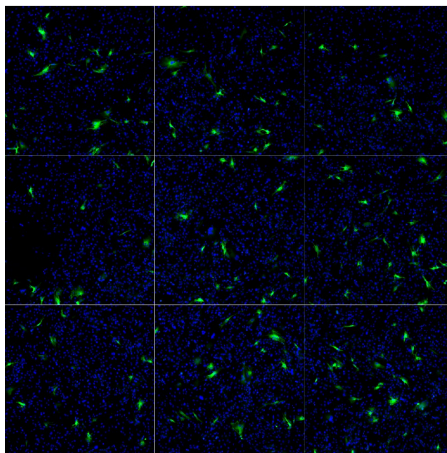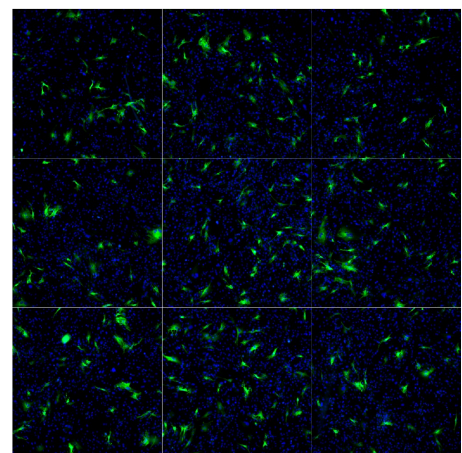

**1:1600  
dilution**

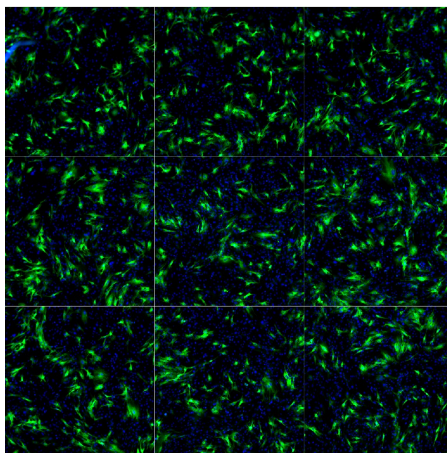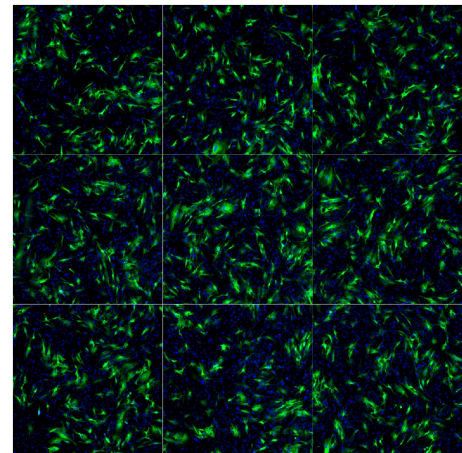

**Virus  
control**

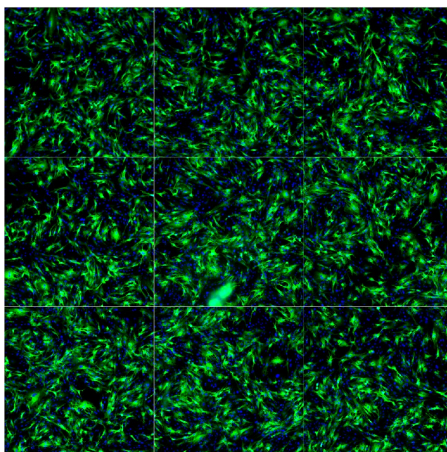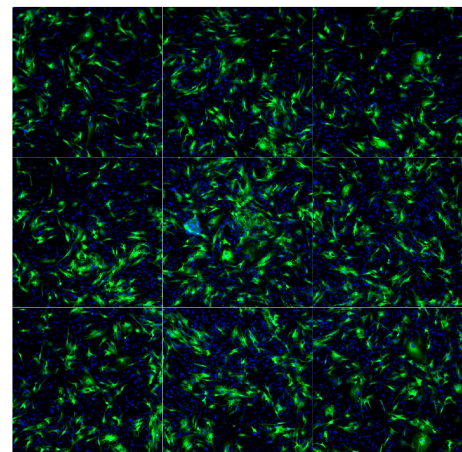

Supplement: pntd.0004960.s001.pdf [file pntd.0004960.s001.pdf]
