# Supplementary material for: Antigenic Variation of East/Central/South African and Asian Chikungunya Virus Genotypes in Neutralization by Immune Sera
Source: PubMed Central journal article supplement (PMC5003353; doi:10.1371/journal.pntd.0004960), 2016-08-29

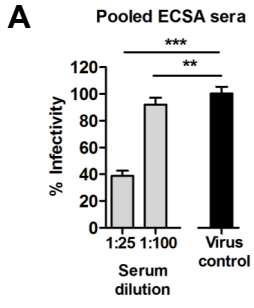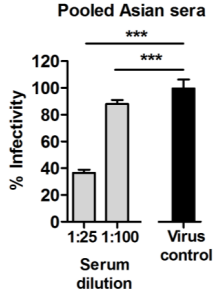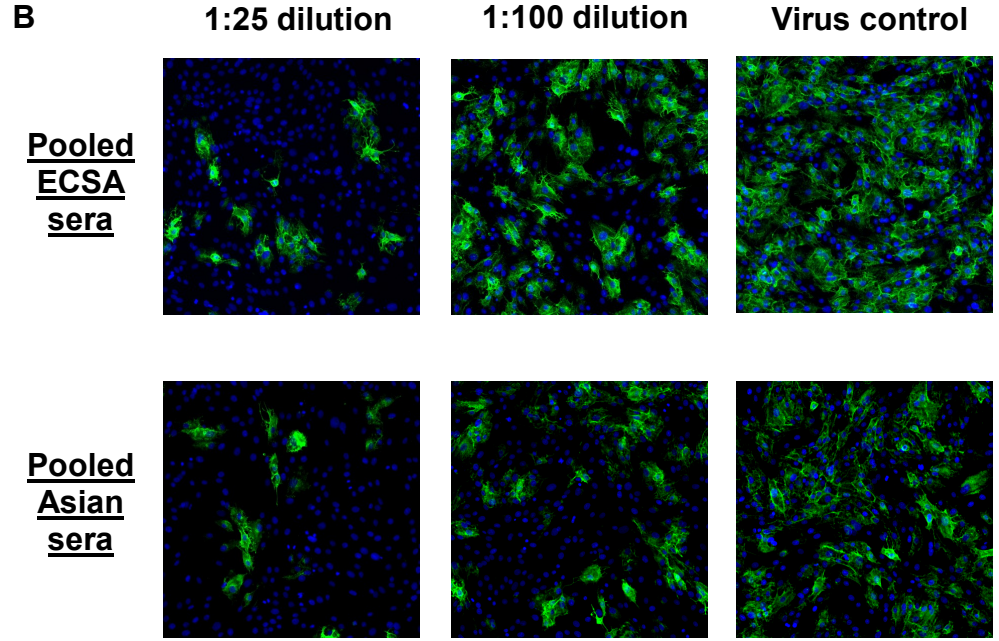

Supplement: pntd.0004960.s004.pdf [file pntd.0004960.s004.pdf]
