# Supplementary material for: Antigenic Variation of East/Central/South African and Asian Chikungunya Virus Genotypes in Neutralization by Immune Sera
Source: PubMed Central journal article supplement (PMC5003353; doi:10.1371/journal.pntd.0004960), 2016-08-29

**A**

|                     |   |   |     |     |     |     |     |     |     |     |     |     |     |     |     |
|---------------------|---|---|-----|-----|-----|-----|-----|-----|-----|-----|-----|-----|-----|-----|-----|
| ICRES1 (ECSA)       | T | N | S   | K   | V   | T   | G   | G   | N   | L   | K   | I   | M   | V   | V   |
| MY/08/065 (ECSA)    | T | N | S   | K   | V   | T   | G   | G   | N   | L   | Q   | I   | M   | V   | V   |
| Amino acid position | 2 | 5 | 118 | 149 | 157 | 164 | 194 | 205 | 207 | 248 | 252 | 255 | 312 | 317 | 318 |
| MY/06/37348 (Asian) | I | H | G   | R   | A   | A   | S   | D   | S   | S   | K   | V   | T   | I   | R   |
| CAR (Asian)         | I | H | G   | R   | A   | A   | S   | D   | S   | F   | K   | V   | T   | I   | R   |

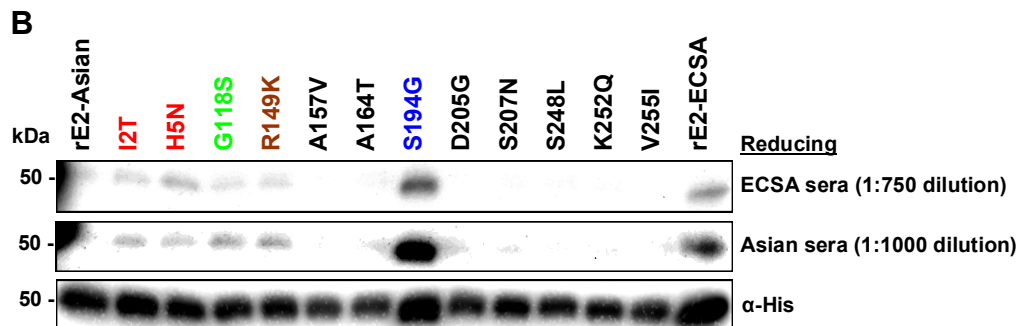

Supplement: pntd.0004960.s005.pdf [file pntd.0004960.s005.pdf]
