# Supplementary material for: Antigenic Variation of East/Central/South African and Asian Chikungunya Virus Genotypes in Neutralization by Immune Sera
Source: PLoS Negl Trop Dis. 2016 Aug 29;10(8):e0004960. doi: 10.1371/journal.pntd.0004960 (PMC5003353; doi:10.1371/journal.pntd.0004960)
Supplement: S4 Table — (DOCX) [file pntd.0004960.s012.docx]

**S4 Table**

The fifty-nine overlapping peptides used for the peptide-based ELISA cover the CHIKV E2 glycoprotein sequence from amino acids 1 to 362, based on the CHIKV MY/08/065 sequence (accession no. FN295485).

| Binding region | Peptide annotation | Sequence |
| --- | --- | --- |
| N-link | LP1 | SGSGSTKDNFNVYKATRPY |
| Domain A | LP4 | SGSGLAHCPDCGEGHSCHS |
| LP5 | SGSGDCGEGHSCHSPVALE |
| LP6 | SGSGHSCHSPVALERIRNE |
| LP7 | SGSGPVALERIRNEATDGT |
| LP8 | SGSGRIRNEATDGTLKIQV |
| LP9 | SGSGATDGTLKIQVSLQIG |
| LP10 | SGSGLKIQVSLQIGIKTDD |
| LP11 | SGSGSLQIGIKTDDSHDWT |
| LP12 | SGSGIKTDDSHDWTKLRYM |
| LP13 | SGSGSHDWTKLRYMDNHMP |
| LP14 | SGSGKLRYMDNHMPADAER |
| LP15 | SGSGDNHMPADAERAGLFV |
| LP16 | SGSGADAERAGLFVRTSAP |
| LP17 | SGSGAGLFVRTSAPCTITG |
| LP18 | SGSGRTSAPCTITGTMGHF |
| LP19 | SGSGCTITGTMGHFILARC |
| LP20 | SGSGTMGHFILARCPKGET |
| LP21 | SGSGILARCPKGETLTVGF |
| LP22 | SGSGPKGETLTVGFTDSRK |
| LP23 | SGSGLTVGFTDSRKISHSC |
| LP24 | SGSGTDSRKISHSCTHPFH |
| LP25 | SGSGISHSCTHPFHHDPPV |
| β-ribbon (arch1) | LP28 | SGSGIGREKFHSRPQHGKE |
| LP29 | SGSGFHSRPQHGKELPCST |
| LP30 | SGSGQHGKELPCSTYVQST |
| LP31 | SGSGLPCSTYVQSTAATTE |
| LP32 | SGSGYVQSTAATTEEIEVH |
| Domain B | LP35 | SGSGMPPDTPDRTLMSQQS |
| LP36 | SGSGPDRTLMSQQSGNVKI |
| LP37 | SGSGMSQQSGNVKITVNGQ |
| LP38 | SGSGGNVKITVNGQTVRYK |
| LP39 | SGSGTVNGQTVRYKCNCGG |
| LP40 | SGSGTVRYKCNCGGSNEGL |
| LP41 | SGSGCNCGGSNEGLTTTDK |
| LP42 | SGSGSNEGLTTTDKVINNC |
| LP43 | SGSGTTTDKVINNCKVDQC |
| LP44 | SGSGVINNCKVDQCHAAVT |
| β-ribbon (arch 2) | LP47 | SGSGNHKKWQYNSPLVPRN |
| LP48 | SGSGQYNSPLVPRNAELGD |
| LP49 | SGSGLVPRNAELGDRQGKI |
| LP50 | SGSGAELGDRQGKIHIPFP |
| LP51 | SGSGRQGKIHIPFPLANVT |
| LP52 | SGSGHIPFPLANVTCRVPK |
| Domain C | LP55 | SGSGARNPTVTYGKNQVIM |
| LP56 | SGSGVTYGKNQVIMLLYPD |
| LP57 | SGSGNQVIMLLYPDHPTLL |
| LP58 | SGSGLLYPDHPTLLSYRNM |
| LP59 | SGSGHPTLLSYRNMGEEPN |
| LP60 | SGSGSYRNMGEEPNYQEEW |
| LP61 | SGSGGEEPNYQEEWVMHKK |
| LP62 | SGSGYQEEWVMHKKEVVLT |
| LP63 | SGSGVMHKKEVVLTVPTEG |
| LP64 | SGSGEVVLTVPTEGLEVTW |
| LP65 | SGSGVPTEGLEVTWGNNEP |
| LP66 | SGSGLEVTWGNNEPYKYWP |
| E2 stem | LP69 | SGSGQLSTNGTAHGHPHEI |
| LP70 | SGSGGTAHGHPHEIILYYY |
| LP71 | SGSGHPHEIILYYYELYPT |

Note: The N-terminus of each peptide was biotinylated and followed by SGSG residues as a spacer, and the C-terminus was amidated.
